# Supplementary material for: Pentagonal five-center four-electron π bond in ternary B3N2H5 cluster: an extension of the concept of three-center four-electron ω bond
Source: Royal Society of Chemistry journal article supplement (doi:10.1039/c6cp07954g), 2016-12-19
Supplement: c6cp07954g1.pdf [file c6cp07954g1.pdf]

## SUPPLEMENTARY INFORMATION

### **Pentagonal five-center four-electron $\pi$ bond in ternary $B_3N_2H_5$ cluster: an extension of the concept of three-center four-electron $\omega$ bond†**

Da-Zhi Li,<sup>\*§a</sup> Lin-Yan Feng,<sup>§b</sup> Ling Pei,<sup>a</sup> Li-Juan Zhang,<sup>a</sup> Shu-Guo Wu,<sup>a</sup> and Hua-Jin Zhai<sup>\*bc</sup>

<sup>§</sup>*D.Z. Li and L.Y. Feng contributed equally to this work.*

<sup>a</sup>*Binzhou Key Laboratory of Materials Chemistry, Department of Chemical Engineering,  
Binzhou University, Binzhou 256603, China. E-mail: ldz005@126.com*

<sup>b</sup>*Nanocluster Laboratory, Institute of Molecular Science, Shanxi University, Taiyuan 030006,  
China. E-mail: hj.zhai@sxu.edu.cn*

<sup>c</sup>*State Key Laboratory of Quantum Optics and Quantum Optics Devices, Shanxi University,  
Taiyuan 030006, China*

**Figure S1.** Alternative optimized low-lying structures of  $B_3N_2H_5$  neutral cluster at the B3LYP/aug-cc-pVTZ level. Relative energies are indicated in kcal mol<sup>-1</sup> at B3LYP with zero-point energy (ZPE) corrections, as well as at the single-point CCSD(T) level (in the parentheses) for top 4 isomers. The B, N, and H atoms are in pink, blue, and gray, respectively.

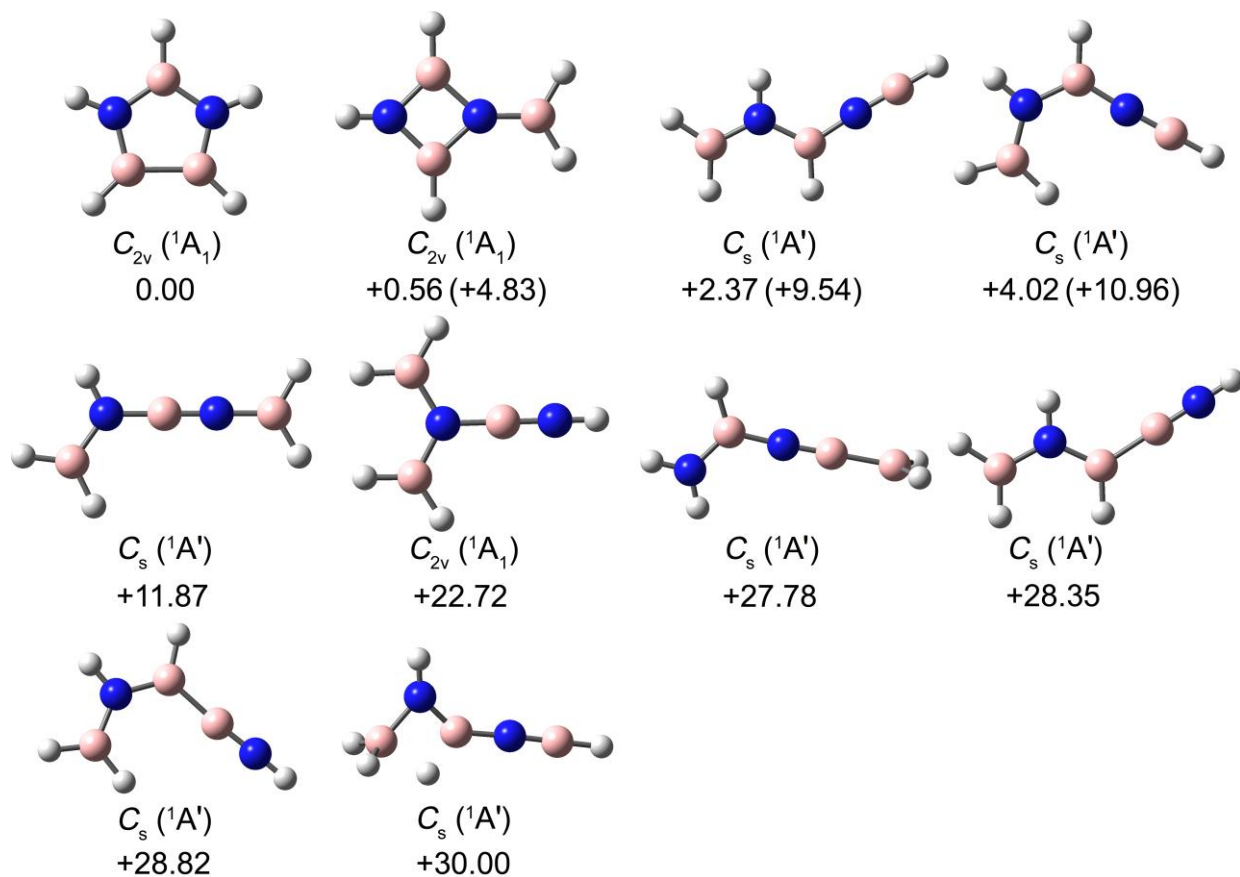

**Figure S2.** Alternative optimized low-lying structures of  $B_3N_2H_5^-$  monoanion cluster at the B3LYP/aug-cc-pVTZ level. Relative energies are indicated in kcal mol<sup>-1</sup> at B3LYP with zero-point energy (ZPE) corrections, as well as at the single-point CCSD(T) level (in the parentheses) for top 4 isomers. The B, N, and H atoms are in pink, blue, and gray, respectively.

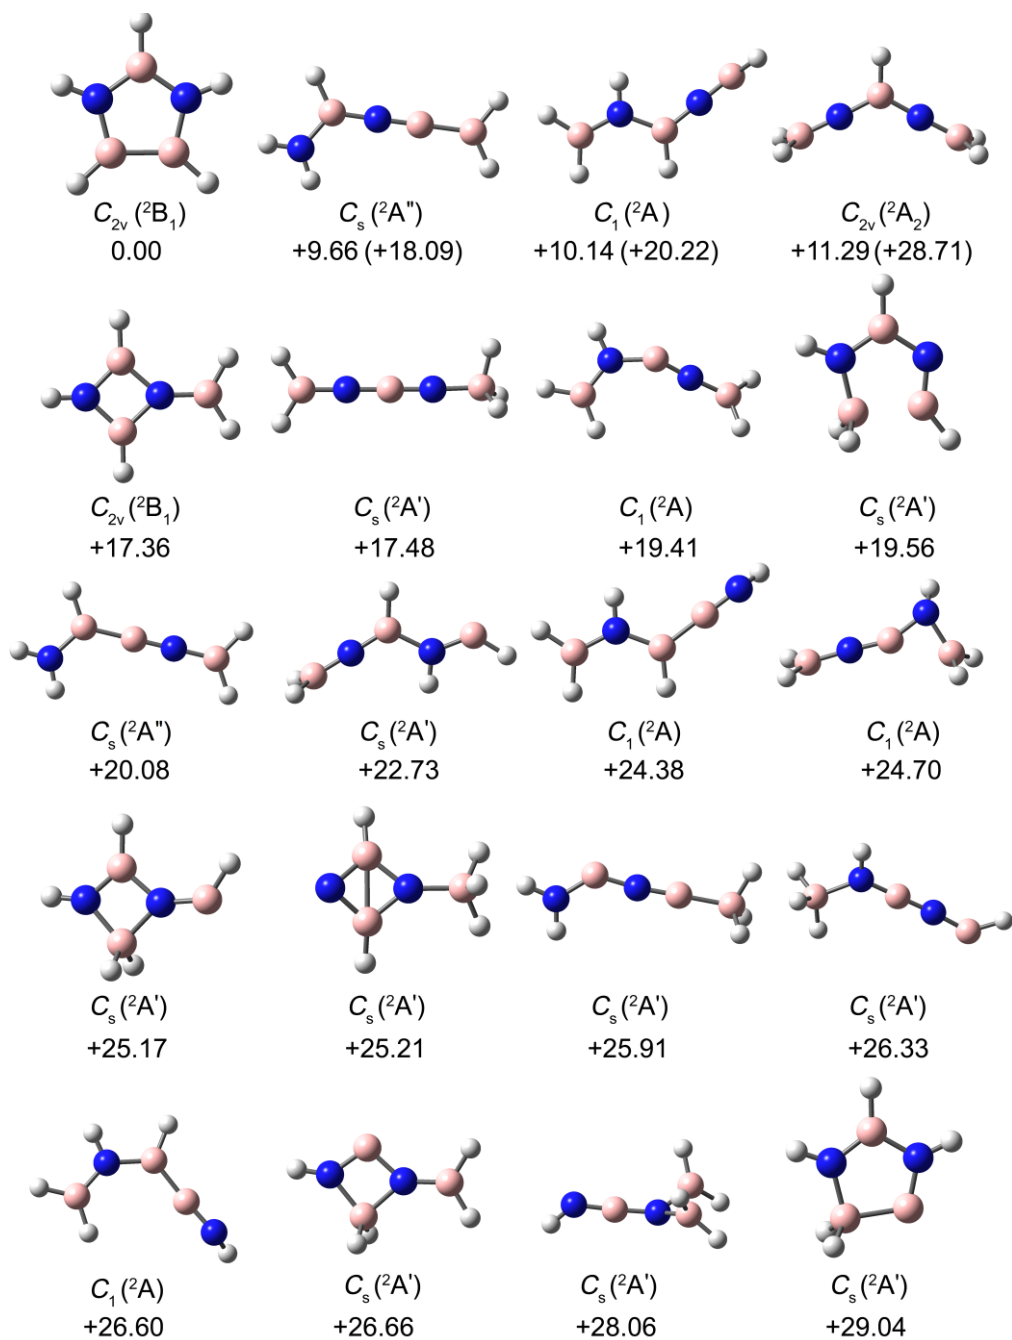

**Figure S3.** Alternative optimized low-lying structures of  $B_3N_2H_5^{2-}$  dianion cluster at the B3LYP/aug-cc-pVTZ level. Relative energies are indicated in kcal mol<sup>-1</sup> at B3LYP with zero-point energy (ZPE) corrections, as well as at the single-point CCSD(T) level (in the parentheses) for top 4 isomers. The B, N, and H atoms are in pink, blue, and gray, respectively.

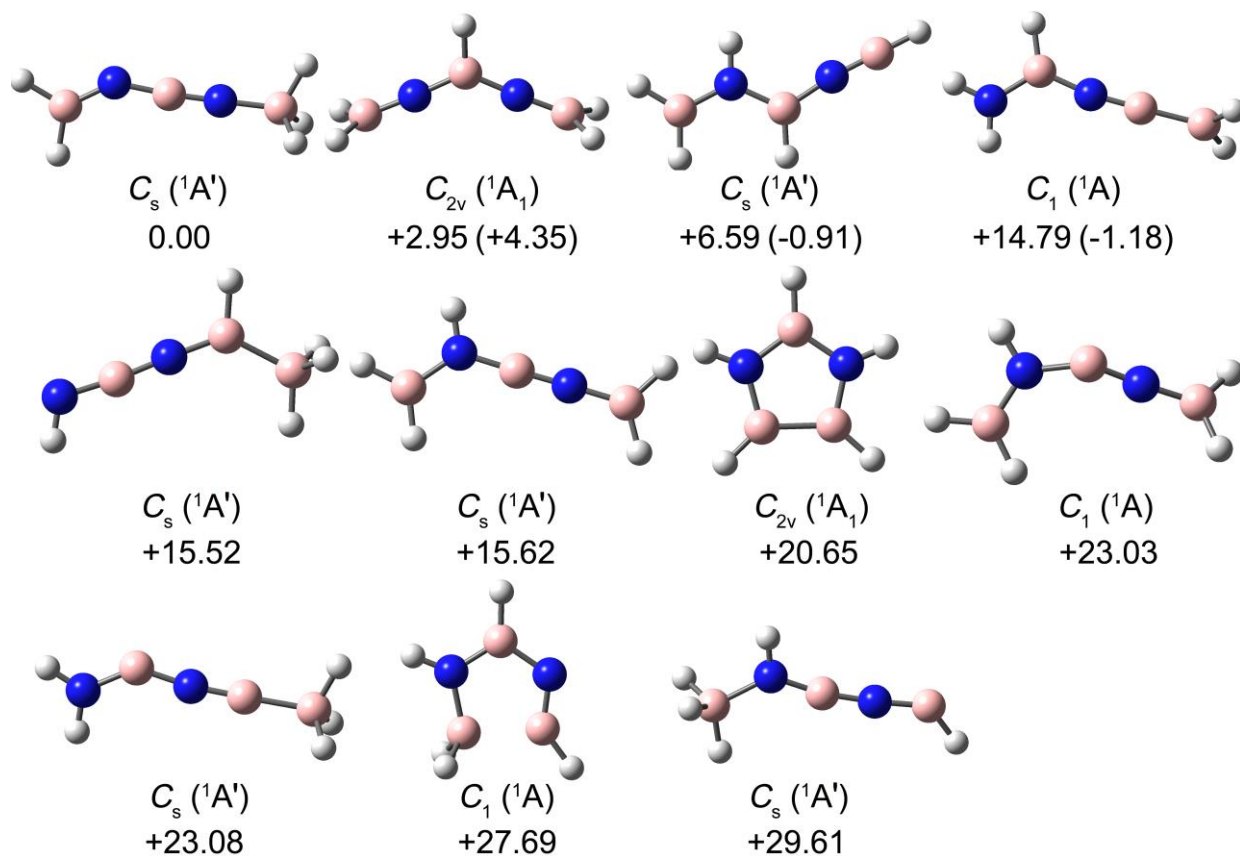

**Figure S4.** Structure and bonding of the chain-like isomer of  $B_3N_2H_5^{2-}$ . The B–N distances (from left to right) are 1.36, 1.38, 1.27, and 1.50 Å, respectively. Two extra charges are located primarily on the two N centers (26% versus 43%). (a) Optimized  $C_s$  ( $^1A'$ ) structure at the B3LYP/aug-cc-pVTZ level. (b) Lewis presentation.

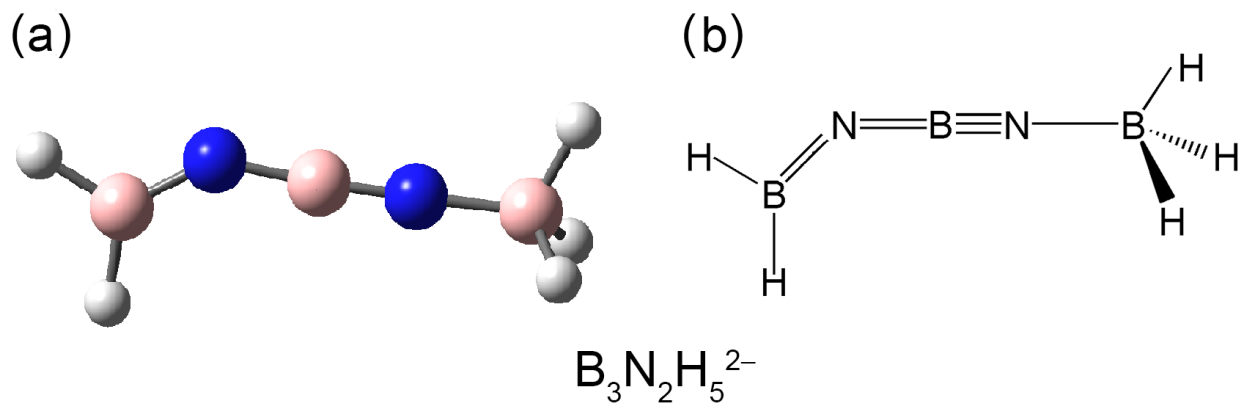

**Figure S5.** Bonding pattern of the chain-like open structure  $C_s$  ( $^1A'$ ) of  $B_3N_2H_5^{2-}$  dianion cluster, based on the adaptive natural density partitioning (AdNDP) analysis. Occupation numbers (ONs) are shown.

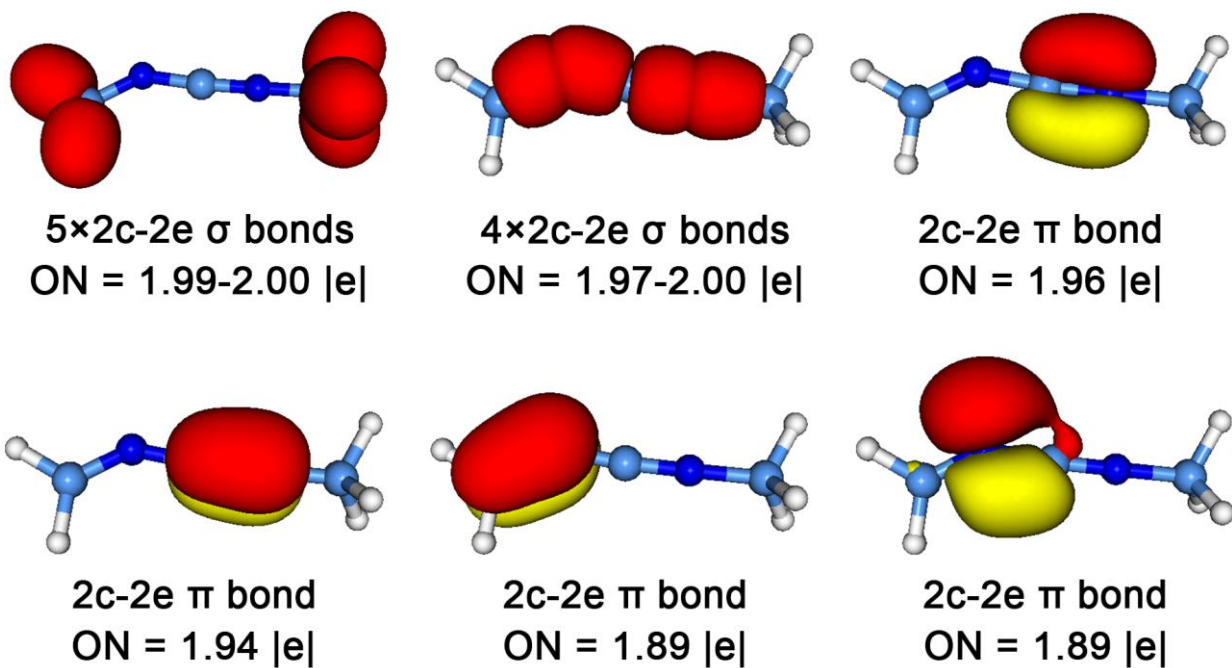

**Figure S6.** Optimized sandwich complexes of  $C_{2h}$   $[(B_3N_2H_5)_2Ni]$  ( ${}^1A_g$ ) and  $C_{2v}$   $[(B_3N_2H_5)_2Ni]$  ( ${}^1A_1$ ) at the B3LYP level. Calculated lowest vibrational frequencies ( $\nu_{min}$ ) are also given. The  $C_{2h}$  structure is more stable (by  $6.07 \text{ kcal mol}^{-1}$ ) than the  $C_{2v}$  one. The B atom is in pink, N in blue, and H in gray.

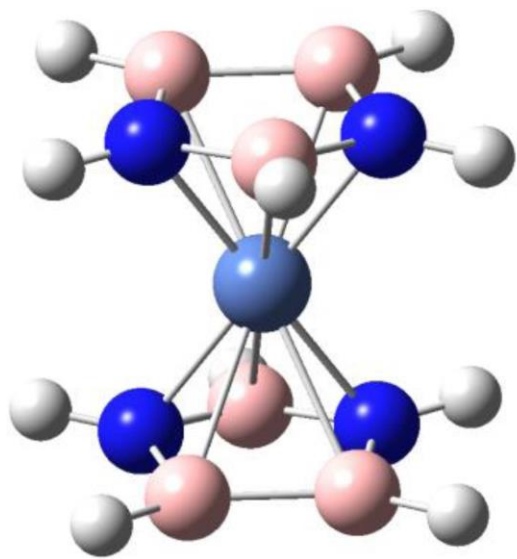

$C_{2h}$   $[(B_3N_2H_5)_2Ni]$  ( ${}^1A_g$ )  
 $114.27 \text{ cm}^{-1}$

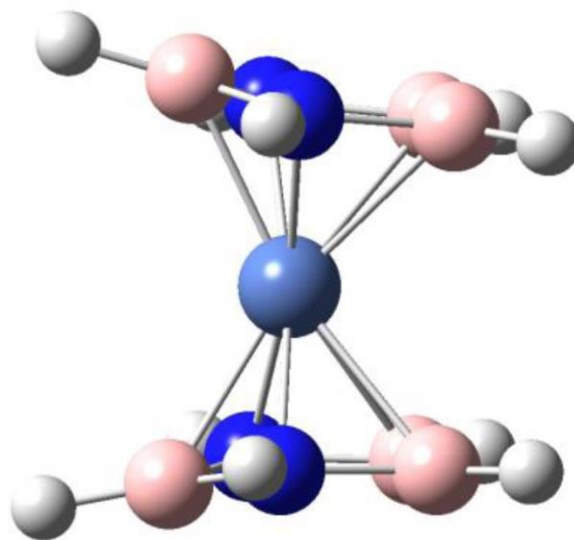

$C_{2v}$   $[(B_3N_2H_5)_2Ni]$  ( ${}^1A_1$ )  
 $100.92 \text{ cm}^{-1}$
